# Supplementary material
Source: publisher site journal article supplement (https://www.dovepress.com/article/supplementary_file/531908/531908%20Supplementary%20Materials.docx)
Supplement: Supplementary file 1 [file 531908%20Supplementary%20Materials.docx]

**Table S1** A comparative analysis of the detection rates among CMT, nasal tNGS, and BALF tNGS

|  | CMT | Nasal tNGS | BALF tNGS |
| --- | --- | --- | --- |
| Detection, n | 91 | 144 | 147 |
| Non-detection, n | 56 | 3 | 0 |
| Detection rates (%) | 61.90% | 98.00% | 100% |
| χ² | - | 37.84* | 39.9* |
| P value | - | <0.001* | <0.001* |

*Compared with CMT.

CMT, conventional microbiological tests; tNGS, targeted next-generation sequencing; BALF, bronchoalveolar lavage fluid.

**Figure S1** Venn diagram of pathogen detection overlaps between CMT, nasal tNGS, and BALF tNGS.


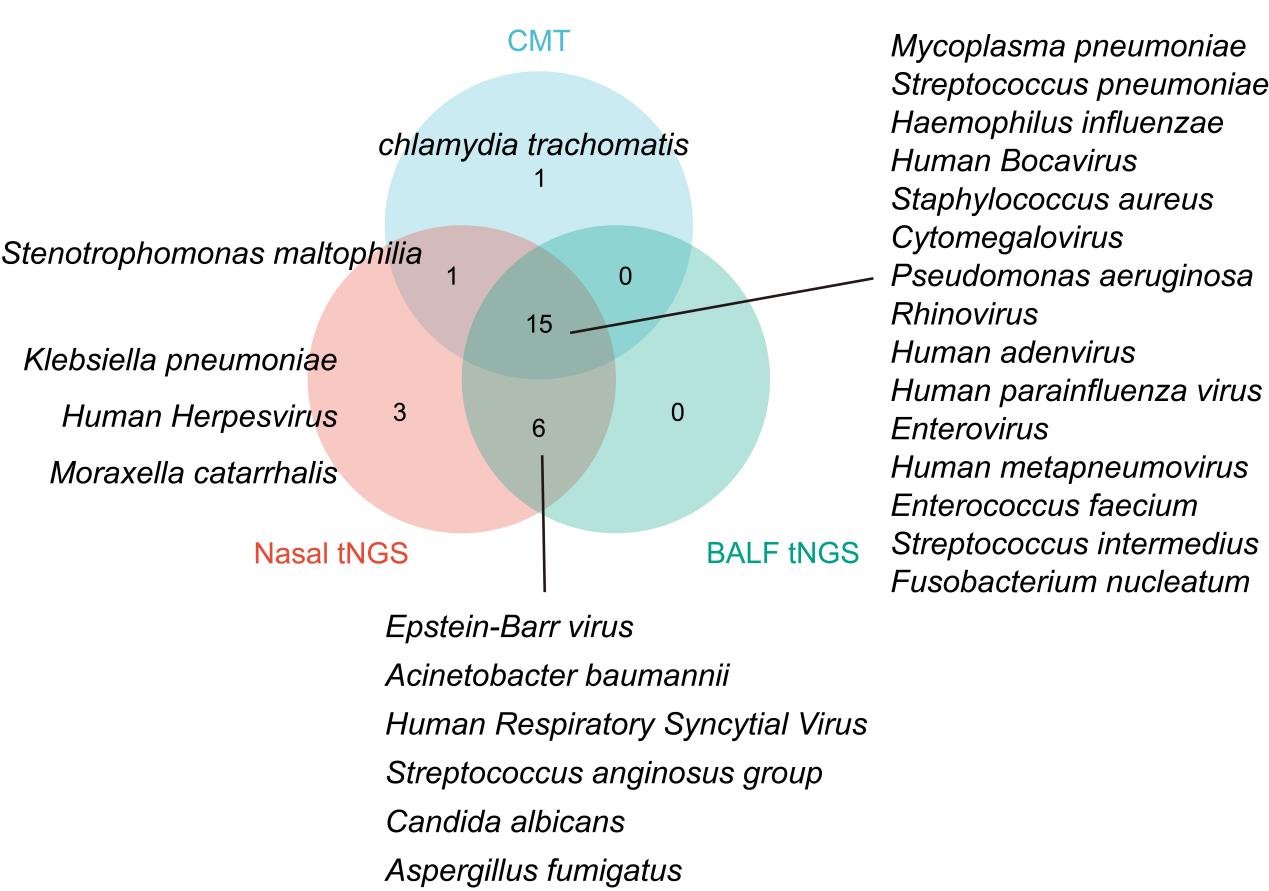


CMT, conventional microbiological tests; tNGS, targeted next-generation sequencing; BALF, bronchoalveolar lavage fluid.
